# Supplementary material for: Genome-Wide Association Study Identifies Novel Loci Potentially Associated with Scab Susceptibility in Japanese Apricot (<em>Prunus mume</em>)
Source: Preprints.org preprint supplement (doi:10.20944/preprints202305.1433.v1), 2023-05-19
Supplement: Supplementary file 1 [file Suppl.tables_Plants.xlsx]

## Sheet: Table S1
Table S1 Ratio of diseased fruits (Rt) and disease severity index (Sv) observed among 108 Japanese apricot accessions in four years, 2016-2019.
		2016		2017		2018		2019		Adjusted averageb		Sequencec
Accession	Groupa	Rt (%)	Sv	%	Sv	%	Sv	%	Sv	%	Sv	SRA acc. no.
85486	T	6.89655	1.14943	0	0	11.1111	1.85185	0	0	4.22448	0.734011	DRR212549
Akebono	O	0	0	0	0	6	1	NA	NA	1.66755	0.197522	DRR212492
Ankoyabai	F	0	0	0	0	35	7.83333	25.3165	6.54008	13.0649	2.58136	DRR212437
Aojiku	F	0	0	0	0	2	0.5	NA	NA	0.555851	0.098761	DRR212438
Asahitaki	O	NA	NA	NA	NA	0	0	6.06061	2.52525	2.76229	1.09729	DRR212493
Benichidori	O	51.4851	13.8614	NA	NA	8.75	2.08333	23	4.5	28.4166	9.10629	DRR212494
Benio	FS	2	0.333333	0	0	0	0	NA	NA	0.737927	0.177741	DRR212545
Benisashi	F	51	16.1667	33	6.33333	54	14.1667	72.7273	22.7273	52.2528	16.4524	DRR212439
Bungo	AM	0	0	6	1.5	15	2.83333	13	1.66667	7.9638	1.48066	DRR212537
Chasenbai	O	NA	NA	NA	NA	0	0	NA	NA	0	0	DRR212495
Chinamume	O	6.89655	1.43678	0	0	46	13.3333	NA	NA	15.3292	3.39975	DRR212496
Ellching	T	54.5455	10.6061	61	15.8333	51	17.5	60	17.6667	58.4561	18.0488	DRR212550
Fudono	F	14.2857	2.38095	0	0	58	19.3333	53.8462	10.8974	28.3139	6.18386	DRR212440
Fukuju	F	13.0435	2.89855	0	0	11	1.83333	NA	NA	7.86975	1.9077	DRR212441
Fushida	AM	20	4.16667	7.14286	1.19048	18	5	NA	NA	15.3574	3.94887	DRR212538
Garyubai	F	NA	NA	0	0	0	0	0	0	0	0	DRR212442
Gekkyuden	O	0	0	0	0	0	0	5.55556	0.925926	1.26605	0.201169	DRR212498
Gofukushidare	O	45.4545	11.3636	NA	NA	4	1.16667	0	0	13.4121	6.2898	DRR212499	DRR212569
Gojiro	F	25.9259	6.17284	0	0	8	1.33333	2.46914	0.411523	9.40453	2.75556	DRR212443	DRR212566
Goshoko	O	NA	NA	0	0	0	0	NA	NA	0	0	DRR212500
Gyokuei	F	21	5.5	0	0	6	1.16667	0	0	7.06184	2.37238	DRR212444	DRR212567
Hachiro	F	11.4286	4.04762	6	1	10	1.83333	0	0	7.12156	2.35619	DRR212445
Hakufunbai	T	14.2857	2.72109	13.253	2.81124	6	2	5	0.666667	10.4839	2.83905	DRR212551
Hakuo	FS	3	0.5	2	0.333333	0	0	NA	NA	1.94003	0.473671	DRR212483
Hanakami	F	NA	NA	NA	NA	2	0.333333	NA	NA	1.66755	0.197522	DRR212446
Hasegawashibori	O	NA	NA	NA	NA	20	3.33333	NA	NA	16.6755	1.97522	DRR212501
Hitoeryokugaku	O	0	0	NA	NA	0	0	NA	NA	0	0	DRR212502
Ikuyonezame	O	NA	NA	NA	NA	5.33333	0.888889	NA	NA	4.44681	0.526726	DRR212503
Inabungo	AM	NA	NA	NA	NA	81.25	45.3125	76	28.6667	68.5114	25.8817	DRR465144
Jakobai	O	NA	NA	NA	NA	65	24.6667	NA	NA	54.1955	14.6166	DRR212504
Jizoume	F	41	7.66667	26	5.5	60	17.1667	39	6.66667	40.8631	9.6199	DRR212447
JO1028-6	F	52	16.6667	51	15.8333	NA	NA	NA	NA	60.6469	28.0835	DRR465145
Jumbotakada	AM	NA	NA	0	0	54	10	NA	NA	22.512	2.96283	DRR212539
Juro	F	0	0	0	0	1	0.166667	NA	NA	0.277926	0.0329203	DRR212448
Kagajizo	F	18	8.5	2	0.5	9	1.5	3.75	0.416667	8.33645	3.94498	DRR212449
Kahoku	F	0	0	0	0	0	0	NA	NA	0	0	DRR212450
Kaidarewase	F	1	0.166667	2	0.333333	8	1.83333	NA	NA	3.42551	0.658053	DRR212451
Kairyouchida	F	2	0.333333	0	0	10	1.66667	NA	NA	3.51718	0.506944	DRR212452
Kanbaishidare	O	8.92857	1.4881	NA	NA	20	3.33333	12.6761	3.05164	12.7045	2.3359	DRR212506
Kanseishidare	O	4	0.666667	0	0	2	0.333333	0	0	1.52378	0.315992	DRR212507
Kanshikobai	AM	NA	NA	0	0	0	0	0	0	0	0	DRR212540
Kensaki	F	0	0	0	0	0	0	0	0	0	0	DRR212453
Kinko	O	2.22222	0.555556	0	0	15	3	NA	NA	4.9888	0.888801	DRR212508
Kinotakara	F	1	0.166667	1.92308	0.641026	44	16.3333	NA	NA	13.3988	3.71326	DRR212454	DRR212568
Kinugasa	FS	0	0	0	0	0	0	NA	NA	0	0	DRR212484
Kinyuji	F	NA	NA	0	0	0	0	NA	NA	0	0	DRR212455
Kodama	F	2.63158	0.438596	0	0	4	0.666667	0	0	1.56199	0.274163	DRR212456
Koshusaisho	FS	1	0.333333	0	0	0	0	NA	NA	0.368963	0.177741	DRR212485
Kotsubunanko	F	52.5253	17.3401	51	13.1667	93	52.8333	63	16	64.2111	24.3717	DRR212457
Koyokoume	FS	0	0	0	0	0	0	NA	NA	0	0	DRR212486
Kushino	F	0	0	0	0	3	0.5	0	0	0.625333	0.0740708	DRR212458
Maezawakoume	FS	1	0.166667	0	0	0	0	NA	NA	0.368963	0.0888705	DRR212487
Mangetsushidare	O	0	0	0	0	2	0.333333	NA	NA	0.555851	0.0658407	DRR212511
Meotoshidare	O	NA	NA	NA	NA	3	0.5	NA	NA	2.50133	0.296283	DRR212512
Mera	O	3	0.5	0	0	0	0	NA	NA	1.10689	0.266612	DRR212513
Michishirube	O	24.5455	6.81818	NA	NA	0	0	0	0	9.05638	3.63561	DRR212514
Misato1	F	32.6923	15.0641	0	0	0	0	NA	NA	12.0623	8.03253	DRR212459
Morinoseki	O	46.6667	10.5556	4.7619	0.793651	19	4.83333	7.04225	1.64319	19.9668	5.66412	DRR212515
Naniwa	F	NA	NA	0	0	0	0	NA	NA	0	0	DRR212460
Nanko	F	70	18.8333	62	16.1667	92.9293	50.8418	85	34.6667	77.4823	30.1271	DRR212461
OK1	FS	0	0	0	0	NA	NA	NA	NA	0	0	DRR465146
Okinaume	O	NA	NA	0	0	22	7.83333	11	1.33333	9.45674	1.9335	DRR212517
Okunoume	F	0	0	0	0	8	1.33333	NA	NA	2.22341	0.263363	DRR212463
Omoinomama	O	NA	NA	NA	NA	0	0	NA	NA	0	0	DRR212518
Orihime	FS	0	0	0	0	0	0	NA	NA	0	0	DRR212488
Osakazuki	O	NA	NA	NA	NA	10	1.83333	0	0	4.16889	0.543186	DRR212519
Oshuku	F	2	0.333333	0	0	9	1.5	0	0	2.42944	0.355518	DRR212464
Ozaki	F	0	0	0	0	5	0.833333	NA	NA	1.38963	0.164602	DRR212465
PM1-1	SM	NA	NA	0	0	0	0	NA	NA	0	0	DRR212546
Purplequeen	FS	NA	NA	0	0	0	0	NA	NA	0	0	DRR212489
Rinshibai	AM	NA	NA	NA	NA	0	0	NA	NA	0	0	DRR465147
Rinshu-Fukui	F	0	0	0	0	5	0.833333	NA	NA	1.38963	0.164602	DRR212466
Rinshu-Nara	F	NA	NA	NA	NA	1	0.166667	NA	NA	0.833777	0.098761	DRR212467
Ryukyokoume	FS	50	12.5	18.1818	3.78788	66	20	NA	NA	44.3653	12.9687	DRR212490
Sabashiko	O	NA	NA	NA	NA	25	7.29167	NA	NA	20.8444	4.3208	DRR212520
Sadayuume	F	57	17.1667	27	5	80	30.5	62	22.3333	55.0134	18.5652	DRR212468
Sakamoto	F	0	0	2	0.333333	2	0.333333	0	0	1.04175	0.204675	DRR212469
Seiko	F	47	16.6667	46	10.5	NA	NA	NA	NA	54.7554	23.1141	DRR212470
Seiryushidare	O	0	0	0	0	20	3.5	0	0	4.16889	0.518495	DRR212521
Seishu	F	13	2.33333	34	7.33333	NA	NA	NA	NA	28.4399	8.69923	DRR465148
Seiyobai	AM	0	0	0	0	9	1.5	1	0.166667	2.10389	0.258423	DRR212543
Shinanokoume	FS	0	0	NA	NA	NA	NA	NA	NA	0	0	DRR212491
Shinheike	O	0	0	0	0	9	1.66667	0	0	1.876	0.246903	DRR212522
Shiratama	F	30.2326	8.52713	10	2.16667	53	13.1667	NA	NA	30.0505	8.49346	DRR212471
Shirokaga	F	50	14.6667	0	0	7	1.16667	NA	NA	20.3937	8.05105	DRR212472
Shisen	F	60	23.3333	0	0	11	1.83333	NA	NA	25.195	12.804	DRR212473
ST	T	0	0	10	1.66667	9	2.16667	5	1	6.13973	1.31471	DRR212552
Suishinbai	O	0	0	0	0	0	0	0	0	0	0	DRR212524
Sumomoume	SM	3	0.5	0	0	81.8182	29.4372	87	21.3333	37.7111	9.19577	DRR212547
Tagonotsuki	O	NA	NA	0	0	5.76923	0.961538	0	0	1.60342	0.189925	DRR212525
Taihei	AM	2.35294	0.392157	3	0.666667	8	1.83333	NA	NA	4.34127	0.985349	DRR212544
Taiwan	T	NA	NA	0	0	2	0.333333	0	0	0.555851	0.0658407	DRR212553	DRR212570
Tamabotan	O	NA	NA	NA	NA	37.2881	8.19209	NA	NA	31.09	4.85436	DRR212526
Tanfun	O	65.1515	21.2121	NA	NA	23.8095	7.14286	NA	NA	45.9837	19.0825	DRR212527
Tenjin	F	50	18.75	51	12.3333	98	62.6667	78.0488	32.9268	67.984	29.6817	DRR212475
Toji	O	NA	NA	NA	NA	0	0	NA	NA	0	0	DRR212528
Tojikobai	F	76	16.3333	10	2.33333	73	26.6667	NA	NA	52.4955	15.426	DRR212476
Toyadenotaka	O	0	0	NA	NA	0	0	NA	NA	0	0	DRR212529
Tsukushiko	O	NA	NA	NA	NA	10.5263	1.75439	NA	NA	8.7766	1.03959	DRR212530
Unryu	O	NA	NA	NA	NA	61.1111	21.7593	NA	NA	50.953	12.8938	DRR212531
Utsushiroyama	O	NA	NA	NA	NA	0	0	NA	NA	0	0	DRR212533
W2	F	92.0792	38.7789	89	35.1667	NA	NA	NA	NA	100	63.7838	DRR465149
Yaetoji	O	NA	NA	0	0	86	47.8333	NA	NA	35.8524	14.1722	DRR212534
Yakushi	F	49	19.3333	7	1.66667	56	17.8333	NA	NA	36.5591	14.8668	DRR212478
Yanagawashibori	O	0	0	2	0.333333	2	0.333333	0	0	1.04175	0.204675	DRR212535
Yogo1	F	13.8462	3.33333	0	0	7	1.33333	NA	NA	7.0542	2.04077	DRR212479
Yosei	F	3	0.5	1	0.166667	0	0	0	0	1.1426	0.277606	DRR212480
Zaronbai	F	2.94118	0.490196	2	0.5	18	3.66667	NA	NA	6.92099	1.29622	DRR212481
a F: Fruit accessions, FS: Small-fruit accessions, O: Ornamental accessions, T: Taiwanese accessions, AM: accessions derived from P. mume × P. armeniaca, SM: accessions derived from P. mume × P. salicina.
b Average values after adjustment of each data using the average values of 'Nanko' over the four-year peried.
c SRA run accession numbers for raw fastq sequences of each accession.

## Sheet: Table S2
Table S2. Significant GWAS peaks (FDR < 0.1) for the ratio of diseased fruits (Rt) in 2017.
Trait	Chromosome	Pos	-log10P
Rt2017	1	28448954	4.38405
Rt2017	2	17899184	3.99568
Rt2017	2	17996016	4.17522
Rt2017	2	18159465	4.17522
Rt2017	2	20765244	4.01818
Rt2017	2	23000599	5.15366
Rt2017	3	25848635	4.44733
Rt2017	5	3464604	4.11464
Rt2017	5	15041135	5.28819
Rt2017	6	6442028	3.97469
Rt2017	6	6442137	3.97469
Rt2017	6	17195508	4.47625
Rt2017	6	17406298	4.65561
Rt2017	6	17415037	4.65561
Rt2017	6	17492260	4.49485
Rt2017	6	17549315	4.49485
Rt2017	6	17768010	4.67985
Rt2017	6	17771326	4.60033
Rt2017	6	17771440	4.67985
Rt2017	6	17771496	4.32975
Rt2017	6	17771501	4.32975
Rt2017	6	17966849	4.40121
Rt2017	6	17966890	4.40121
Rt2017	6	18230070	4.26841
Rt2017	6	18363707	4.284
Rt2017	7	452914	4.3019
Rt2017	7	452935	4.29671
Rt2017	7	452976	4.3019
Rt2017	7	453015	4.45593
Rt2017	7	453045	4.44249
Rt2017	7	17776285	4.23882
Rt2017	7	17776453	4.23882
Rt2017	7	17776481	4.23882
Rt2017	8	19895234	5.33724
Rt2017	8	19956845	5.33724
Rt2017	8	20009405	5.33724
Rt2017	8	20095763	5.33724
Rt2017	8	20311602	4.05404
Rt2017	8	20392183	4.34775
Rt2017	8	20396172	4.34775
Rt2017	8	20396173	4.34775
Rt2017	8	20404023	4.19518

## Sheet: Table S3
Table S3. Significant GWAS peaks (FDR < 0.1) for disease severity index (Sv) in 2017.
Trait	Chromosome	Pos	-log10P
Sv2017	1	9065649	3.82391
Sv2017	1	10714049	4.47756
Sv2017	1	10714353	4.47756
Sv2017	1	10800694	4.44009
Sv2017	1	10800709	4.44009
Sv2017	1	11096087	4.43063
Sv2017	1	11096095	4.43063
Sv2017	1	11096108	4.47756
Sv2017	1	11108294	4.47756
Sv2017	1	11109973	4.47756
Sv2017	1	23567703	4.24642
Sv2017	1	23967541	6.34486
Sv2017	1	27350042	4.36351
Sv2017	1	27362524	4.34582
Sv2017	1	28100634	4.48945
Sv2017	1	28100841	4.4908
Sv2017	1	28107182	4.48945
Sv2017	1	28443684	4.50864
Sv2017	1	28448688	4.50864
Sv2017	1	28448696	4.50864
Sv2017	1	28448932	4.50864
Sv2017	1	28448954	5.11182
Sv2017	1	28460048	4.48545
Sv2017	1	28460188	4.47625
Sv2017	2	4120518	4.27327
Sv2017	2	6640657	3.94692
Sv2017	2	17866373	6.49757
Sv2017	2	17899184	6.72354
Sv2017	2	17902254	6.41454
Sv2017	2	17996016	6.82102
Sv2017	2	18072078	3.91009
Sv2017	2	18072087	3.91009
Sv2017	2	18159465	6.82102
Sv2017	2	19645472	3.98297
Sv2017	2	19658058	4.03339
Sv2017	2	19791377	3.7986
Sv2017	2	20765244	7.15989
Sv2017	2	23000599	5.00261
Sv2017	2	23703163	3.73518
Sv2017	3	21816278	6.42481
Sv2017	3	22158771	3.70997
Sv2017	3	25527982	3.65956
Sv2017	3	25848635	3.95468
Sv2017	5	3464604	4.54516
Sv2017	5	11940711	4.34199
Sv2017	5	11940795	4.34199
Sv2017	5	11940803	4.34199
Sv2017	5	11940823	4.34199
Sv2017	5	15041135	5.31785
Sv2017	5	17957621	3.88941
Sv2017	6	5300628	4.04672
Sv2017	6	6095818	4.00087
Sv2017	6	6400303	6.69465
Sv2017	6	6400451	6.69465
Sv2017	6	6442010	6.60906
Sv2017	6	6442028	6.77989
Sv2017	6	6442137	6.77989
Sv2017	6	16958017	6.62709
Sv2017	6	17195328	3.61979
Sv2017	6	17195508	6.97881
Sv2017	6	17406298	7.07007
Sv2017	6	17415037	7.07007
Sv2017	6	17492094	4.0942
Sv2017	6	17492260	7.01909
Sv2017	6	17549315	7.01909
Sv2017	6	17768010	7.1707
Sv2017	6	17771326	7.03527
Sv2017	6	17771440	7.1707
Sv2017	6	17771496	6.97881
Sv2017	6	17771501	6.97881
Sv2017	6	17966849	7.0278
Sv2017	6	17966890	7.0278
Sv2017	6	18230070	6.95468
Sv2017	6	18363707	6.92445
Sv2017	7	452914	3.93554
Sv2017	7	452935	3.93554
Sv2017	7	452976	3.93554
Sv2017	7	453015	3.83268
Sv2017	7	453045	3.82974
Sv2017	7	17776285	4.03105
Sv2017	7	17776453	4.03105
Sv2017	7	17776481	4.03105
Sv2017	8	325461	4.45717
Sv2017	8	5750721	3.95861
Sv2017	8	5858478	3.95861
Sv2017	8	6475415	3.96257
Sv2017	8	14751456	3.76955
Sv2017	8	14751462	3.76955
Sv2017	8	16312021	3.66354
Sv2017	8	19856573	3.92445
Sv2017	8	19895234	5.21254
Sv2017	8	19956845	5.21254
Sv2017	8	20009405	5.21254
Sv2017	8	20095763	5.21254
Sv2017	8	20311602	3.67985
Sv2017	8	20392183	3.97881
Sv2017	8	20396172	3.97881
Sv2017	8	20396173	3.97881

## Sheet: Table S4
Table S4. Significant GWAS peaks (FDR < 0.1) for disease severity index (Sv) in 2018.
Trait	Chromosome	Pos	-log10P
Sv2018	1	8145389	4.57349
Sv2018	1	17415002	5.98716
Sv2018	2	23000599	4.83863
Sv2018	3	1039798	4.20971
Sv2018	3	1049958	4.20971
Sv2018	5	8245884	4.61798
Sv2018	5	8245891	4.39686
Sv2018	6	20191771	4.28567
Sv2018	8	19895234	4.90658
Sv2018	8	19956845	4.90658
Sv2018	8	20009405	6.11805
Sv2018	8	20095763	6.11805
Sv2018	8	20311602	4.42136
Sv2018	8	20392183	5.69897
Sv2018	8	20396172	5.69897
Sv2018	8	20396173	5.69897
Sv2018	8	20404023	4.39254
Sv2018	8	20589478	5.61083
Sv2018	8	20589758	5.61261
Sv2018	8	20959559	5.63827
Sv2018	8	20974480	5.62893
Sv2018	8	20987332	5.63827
Sv2018	8	21013134	5.6216
Sv2018	8	21013159	5.6216
Sv2018	8	21051015	5.69037
Sv2018	8	21051020	5.69037
Sv2018	8	21051107	5.72125

## Sheet: Table S5
Table S5. Adjusted average disease severity index (Sv_Ave.) values and genotypesa at nine significant GWAS peaks detected in multiple years.
			Chr.2	Chr. 8
Group	Accession	Sv_Ave.	23000599	19895234	19956845	20009405	20095763	20311602	20392183	20396172	20396173
F	W2	63.7838	T	R	W	Y	S	C	T	G	C
F	Nanko	30.1271	W	R	W	Y	S	C	T	G	C
F	Tenjin	29.6817	T	R	W	Y	S	C	T	G	C
F	Jizoume	28.0835	W	A	T	C	G	Y	K	R	Y
AM	Inabungo	25.8817	W	A	T	C	G	Y	G	A	T
F	Kotsubunanko	24.3717	T	R	W	Y	S	C	T	G	C
F	Seiko	23.1141	W	A	T	C	G	C	T	G	C
O	Tanfun	19.0825	W	R	W	Y	S	C	T	G	C
F	Sadayuume	18.5652	W	R	W	Y	S	C	T	G	C
T	Ellching	18.0488	A	A	T	C	G	Y	G	A	T
F	Benisashi	16.4524	T	A	T	C	G	Y	G	A	T
F	Tojikobai	15.426	W	A	T	C	G	C	T	G	C
F	Yakushi	14.8668	A	A	T	C	G	Y	K	R	Y
F	JO1028-6	14.6166	A	A	T	C	G	Y	G	A	T
O	Yaetoji	14.1722	W	A	T	C	G	Y	K	R	Y
FS	Ryukyokoume	12.9687	A	R	W	Y	S	Y	G	A	T
O	Unryu	12.8938	W	A	T	C	G	Y	K	R	Y
F	Shisen	12.804	A	A	T	C	G	Y	G	A	T
F	Jakobai	9.6199	W	A	T	C	G	Y	K	R	Y
SM	Sumomoume	9.19577	A	A	T	C	G	Y	G	A	T
O	Benichidori	9.10629	W	A	T	C	G	Y	K	R	Y
F	Seishu	8.69923	W	A	T	C	G	Y	K	R	Y
F	Shiratama	8.49346	A	A	T	C	G	Y	G	A	T
F	Shirokaga	8.05105	W	A	T	C	G	Y	G	A	T
F	Misato1	8.03253	W	A	T	C	G	Y	G	A	T
O	Gofukushidare	6.2898	W	A	T	C	G	Y	G	A	T
F	Fudono	6.18386	W	A	T	C	G	Y	K	R	Y
O	Morinoseki	5.66412	A	A	T	C	G	Y	K	R	Y
O	Tamabotan	4.85436	W	A	T	C	G	Y	K	R	Y
O	Sabashiko	4.3208	W	A	T	C	G	Y	K	R	Y
AM	Fushida	3.94887	W	A	T	C	G	Y	G	A	T
F	Kagajizo	3.94498	W	A	T	C	G	Y	G	A	T
F	Kinotakara	3.71326	A	A	T	C	G	Y	K	R	Y
O	Michishirube	3.63561	A	A	T	C	G	Y	G	A	T
O	Chinamume	3.39975	W	A	T	C	G	Y	K	R	Y
AM	Jumbotakada	2.96283	W	A	T	C	G	Y	G	A	T
T	Hakufunbai	2.83905	A	A	T	C	G	Y	G	A	T
F	Gojiro	2.75556	W	A	T	C	G	Y	G	A	T
F	Ankoyabai	2.58136	A	A	T	C	G	Y	K	R	Y
F	Gyokuei	2.37238	W	A	T	C	G	Y	G	A	T
F	Hachiro	2.35619	W	A	T	C	G	Y	K	R	Y
O	Kanbaishidare	2.3359	A	A	T	C	G	Y	K	R	Y
F	Yogo1	2.04077	W	A	T	C	G	Y	G	A	T
O	Hasegawashibori	1.97522	A	A	T	C	G	Y	G	A	T
O	Okinaume	1.9335	W	A	T	C	G	Y	G	A	T
F	Fukuju	1.9077	W	A	T	C	G	Y	G	A	T
AM	Bungo	1.48066	T	A	T	C	G	Y	G	A	T
T	ST	1.31471	A	A	T	C	G	Y	G	A	Y
F	Zaronbai	1.29622	A	A	T	C	G	Y	G	A	T
O	Asahitaki	1.09729	W	A	T	C	G	Y	G	A	T
O	Tsukushiko	1.03959	W	A	T	C	G	Y	K	R	Y
AM	Taihei	0.985349	W	A	T	C	G	Y	G	A	T
O	Kinko	0.888801	W	A	T	C	G	Y	G	A	T
T	85486	0.734011	A	A	T	C	G	Y	G	A	T
F	Kaidarewase	0.658053	A	A	T	C	G	Y	K	R	Y
O	Osakazuki	0.543186	W	A	T	C	G	Y	G	A	T
O	Ikuyonezame	0.526726	W	A	T	C	G	Y	G	A	T
O	Seiryushidare	0.518495	A	A	T	C	G	Y	G	A	T
F	Kairyouchida	0.506944	A	A	T	C	G	Y	K	R	Y
FS	Hakuo	0.473671	A	A	T	C	G	Y	K	R	Y
F	Oshuku	0.355518	W	A	T	C	G	Y	G	A	T
O	Kanseishidare	0.315992	A	A	T	C	G	Y	G	A	T
O	Meotoshidare	0.296283	A	A	T	C	G	Y	G	A	T
F	Yosei	0.277606	A	A	T	C	G	Y	G	A	T
F	Kodama	0.274163	A	A	T	C	G	Y	K	R	Y
O	Mera	0.266612	W	A	T	C	G	Y	G	A	T
F	Okunoume	0.263363	W	A	T	C	G	Y	G	A	T
AM	Seiyobai	0.258423	W	A	T	C	G	Y	K	R	Y
O	Shinheike	0.246903	A	A	T	C	G	Y	K	R	Y
F	Sakamoto	0.204675	A	A	T	C	G	Y	G	A	T
O	Yanagawashibori	0.204675	A	A	T	C	G	Y	G	A	T
O	Gekkyuden	0.201169	W	A	T	C	G	Y	K	R	Y
O	Akebono	0.197522	A	A	T	C	G	Y	G	A	T
F	Hanakami	0.197522	W	A	T	C	G	Y	K	R	Y
O	Tagonotsuki	0.189925	A	A	T	C	G	Y	G	A	T
FS	Benio	0.177741	A	A	T	C	G	C	G	A	T
FS	Koshusaisho	0.177741	A	A	T	C	G	Y	K	R	Y
F	Ozaki	0.164602	A	A	T	C	G	Y	G	A	T
F	Rinshu-Fukui	0.164602	W	A	T	C	G	Y	G	A	T
F	Aojiku	0.098761	A	A	T	C	G	Y	G	A	T
F	Rinshu-Nara	0.098761	W	A	T	C	G	Y	K	R	Y
FS	Maezawakoume	0.0888705	A	A	T	C	G	Y	G	A	T
F	Kushino	0.0740708	A	A	T	C	G	Y	G	A	T
O	Mangetsushidare	0.0658407	A	A	T	C	G	Y	G	A	T
T	Taiwan	0.0658407	A	A	T	C	G	Y	G	A	T
F	Juro	0.0329203	A	A	T	C	G	Y	G	A	T
O	Chasenbai	0	W	A	T	C	G	Y	G	A	T
F	Garyubai	0	W	A	T	C	G	Y	G	A	T
O	Goshoko	0	W	A	T	C	G	Y	G	A	T
O	Hitoeryokugaku	0	A	A	T	C	G	Y	G	A	T
F	Kahoku	0	W	A	T	C	G	Y	G	A	T
AM	Kanshikobai	0	A	A	T	C	G	C	K	R	Y
F	Kensaki	0	A	A	T	C	G	Y	G	A	T
FS	Kinugasa	0	W	A	T	C	G	C	K	R	Y
F	Kinyuji	0	A	A	T	C	G	Y	K	R	Y
FS	Koyokoume	0	W	A	T	C	G	Y	G	A	T
F	Naniwa	0	A	A	T	C	G	Y	K	R	Y
FS	OK1	0	W	A	T	C	G	Y	G	A	T
O	Omoinomama	0	A	A	T	C	G	Y	G	A	T
FS	Orihime	0	A	A	T	C	G	Y	G	A	T
SM	PM1-1	0	W	A	T	C	G	Y	G	A	T
FS	Purplequeen	0	A	A	T	C	G	Y	K	R	Y
AM	Rinshibai	0	A	A	T	C	G	C	K	R	Y
FS	Shinanokoume	0	W	A	T	C	G	Y	G	A	T
O	Suishinbai	0	A	A	T	C	G	Y	K	R	Y
O	Toji	0	W	A	T	C	G	Y	G	A	T
O	Toyadenotaka	0	A	R	W	C	G	Y	G	A	T
O	Utsushiroyama	0	A	A	T	C	G	Y	G	A	T
a Genotypes: A, T, C and G: Homozygote for each base. K, R, S, W and Y: Heterozygote of A/T, A/G, C/G, A/T and C/T, respectively.
