# Supplementary material for: Genome-Wide Association Study Identifies Novel Loci Potentially Associated with Scab Susceptibility in Japanese Apricot (<em>Prunus mume</em>)
Source: Preprints.org preprint supplement (doi:10.20944/preprints202305.1433.v1), 2023-05-19
Supplement: Supplementary file 1 [file supplementary]

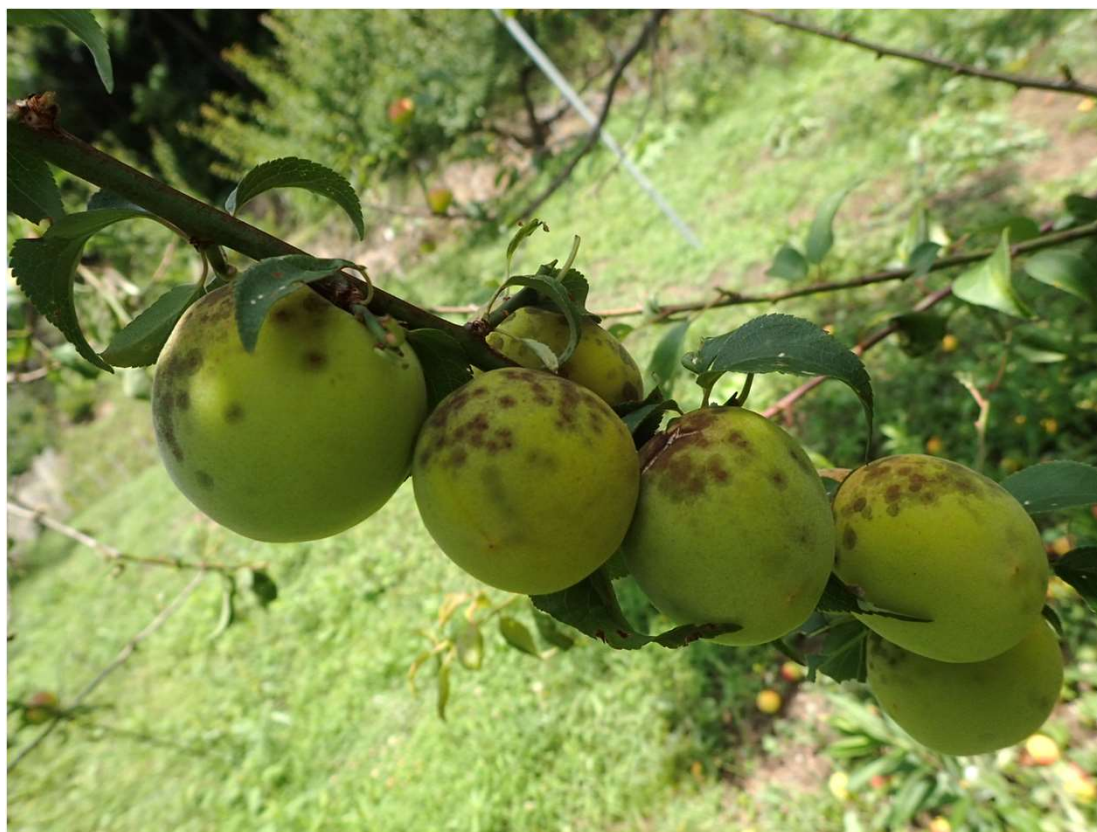

Figure S1. Severe symptoms of scab on Japanese apricot accession 'Nanko'.

(A) Ratio of diseased fruits (Rt; %)

2016

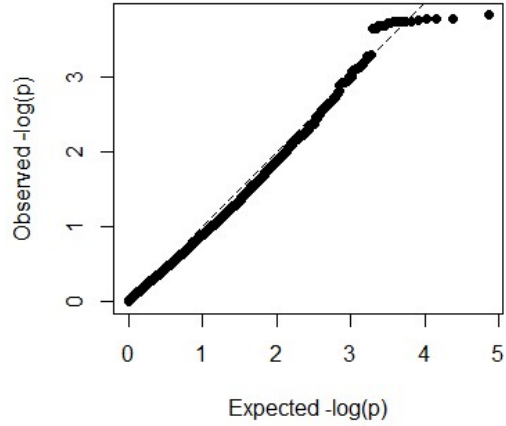

2017

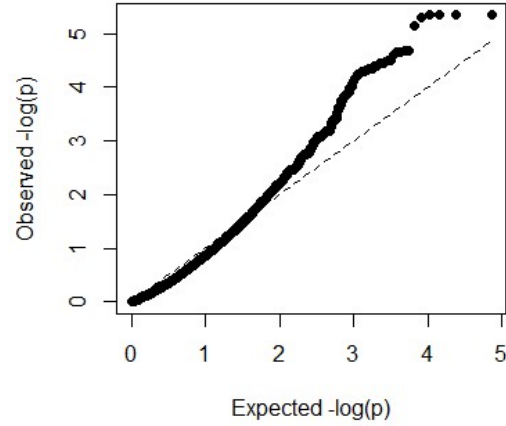

2018

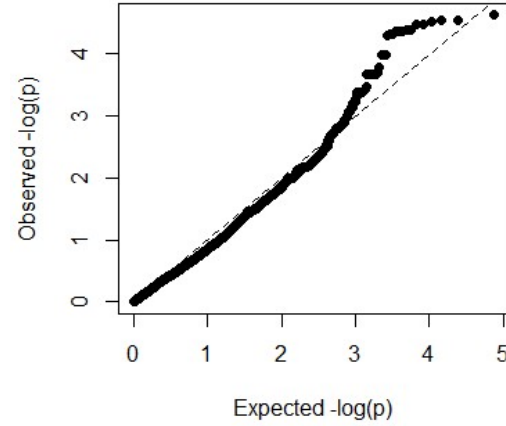

2019

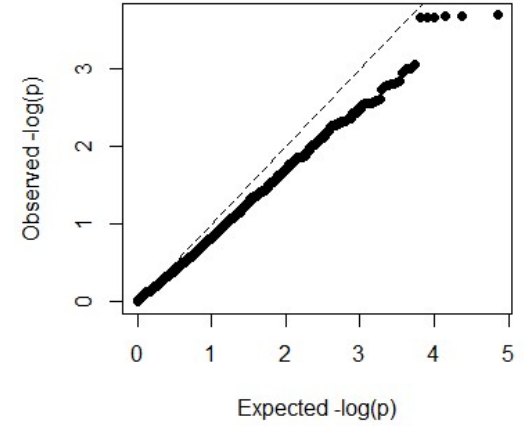

(B) Disease severity index (Sv)

2016

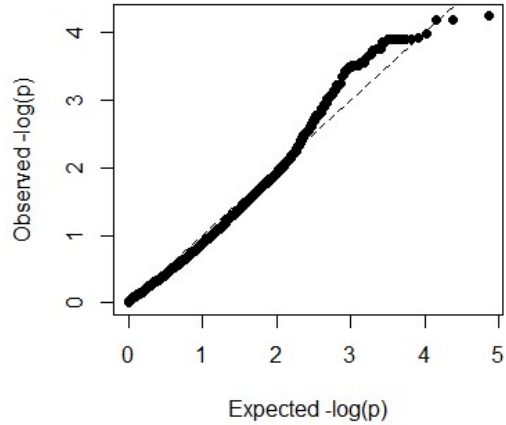

2017

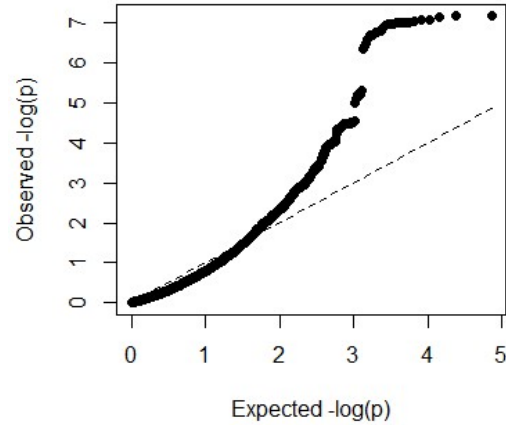

2018

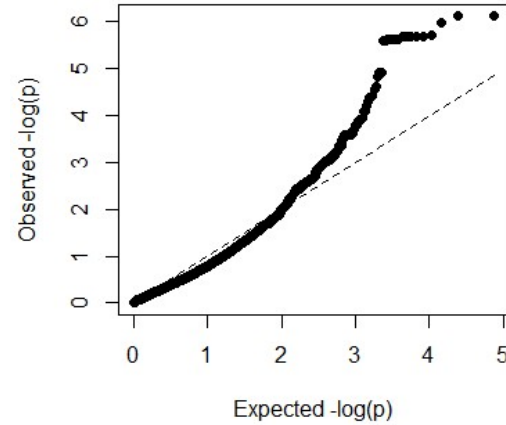

2019

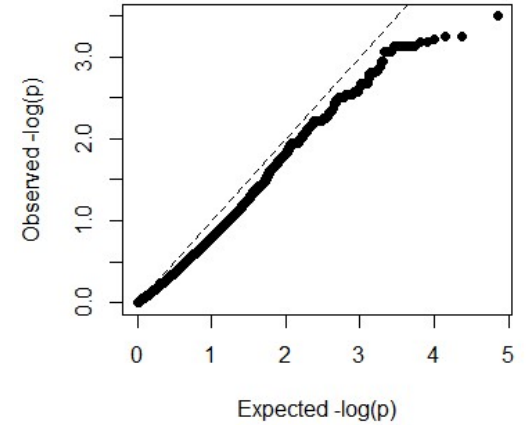

Figure S2. Quantile-Quantile (Q-Q) plots for GWAS analyses of scab resistance traits.

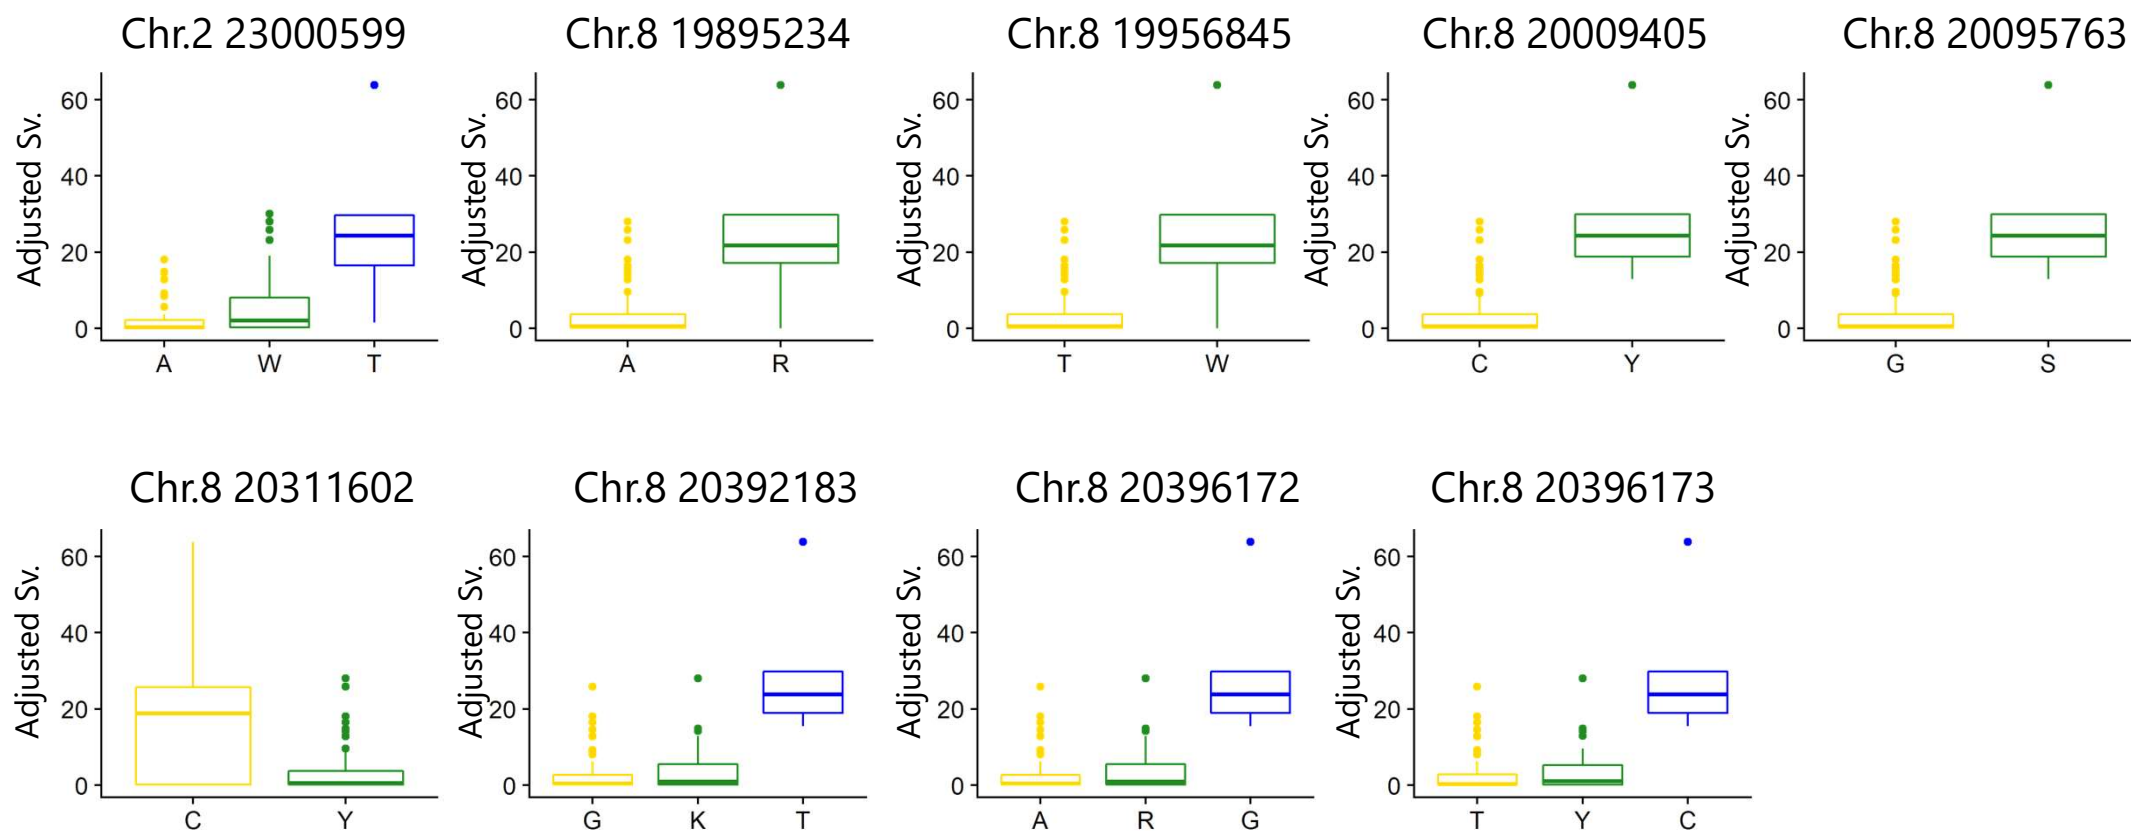

Figure S3. Box plots of adjusted averages of disease severity index (Sv) for genotypes at 9 SNPs detected multiple years in GWAS.

Adjusted Sv.: Adjusted averages of Sv.

Genotypes: A, T, C and G: Homozygote for each base.

K, R, S, W and Y: Heterozygote of A/T, A/G, C/G, A/T and C/T, respectively.
